# Supplementary material for: Nested circuits mediate the decision to vocalize
Source: eLife. 2023 Jun 14;12:e85547. doi: 10.7554/eLife.85547 (PMC10353859; doi:10.7554/eLife.85547)
Supplement: Figure 1—source data 1. [file elife-85547-fig1-data1.xlsx]

## Sheet: 2MT
Number of USVs produced in the absence vs. presence of 2MT
Mouse	Sex	Neutral	2MT
2MT001	M	375	223
2MT002	M	842	524
2MT003	M	1320	1143
2MT004	M	1167	445
2MT005	M	222	417
2MT006	M	498	255
2MT007	M	429	169
2MT008	M	780	153
2MT009	M	132	74
2MT010	M	1006	554
2MT011	M	309	153
2MT012	F	855	32
2MT013	F	498	98

## Sheet: Amg Photometry
Mean peak dF/F (%)
Mouse	Sex	Approached by male	Approaching male	Approaching female	Novel Obj	Attacking	Attacked	2MT	Freeze	Control Odor	Male Bedding	Female Bedding	Light	Sqeak_playback	USV Onset	USV Offset
Amg001	M	0.361223	0.0525	0.621555	0.78345	NA	3.65336	2.12663	0.580026	NA	NA	NA	NA	NA	0.595189	0.390868
Amg002	M	0.892511	1.53771	0.808787	1.01529	1.34343	2.38098	2.40974	0.338035	1.29374	0.733276	0.979583	0.808051	0.530007	0.596024	0.403958
Amg003	M	0.481337	0.610419	0.407748	0.887616	1.24858	2.73516	2.52954	0.787159	0.990266	0.879892	0.628181	0.258877	0.838412	0.541542	0.352607
Amg004	F	0.866586	0.688638	0.788469	0.34187	NA	NA	1.55483	0.168757	1.05878	1.24046	1.08551	0.932844	1.86548	0.519022	0.562595
Amg005	F	1.4065	1.16408	0.395391	0.549951	NA	NA	1.66729	0.367214	0.946705	0.911877	0.990519	0.543862	0.723956	0.674984	0.254849
Amg006	F	0.500189	0.201346	0.166684	0.914971	NA	NA	1.4946	0.285579	0.617957	0.576074	0.792706	1.06218	2.38041	-0.0524095	-0.001999
Amg007	M	1.038	1.254	0.642996	0.835961	1.87178	1.29441	0.941751	0.164882	0.836105	1.33965	0.801773	0.266442	0.386877	0.603157	0.607157
Amg008	M	1.14276	1.62932	1.6251	1.15787	1.45348	2.53339	2.01735	-0.124268	1.35652	1.09639	0.880544	0.407668	0.596603	1.06786	0.611284
STE at mean peak dF/F
Mouse	Sex	Approached by male	Approaching male	Approaching female	Novel Obj	Attacking	Attacked	2MT	Freeze	Control Odor	Male Bedding	Female Bedding	Light	Sqeak_playback
Amg001	M	0.1667	0.151	0.1951	0.1508	NA	0.6967	0.6227	0.6193	NA	NA	NA	NA	NA
Amg002	M	0.1602	0.2768	0.2253	0.1419	0.5296	0.4137	0.3276	0.1593	0.2002	0.1533	0.2125	0.1599	0.1607
Amg003	M	0.257	0.2341	0.5378	0.249	1.3787	0.572	0.3922	0.6893	0.1637	0.2467	0.2106	0.1155	0.2118
Amg004	F	0.2201	0.4519	0.2581	0.1033	NA	NA	0.2283	0.1145	0.1465	0.2354	0.2079	0.1497	0.4632
Amg005	F	0.2783	0.3135	0.2481	0.116	NA	NA	0.4572	0.2734	0.1484	0.2122	0.143	0.1713	0.1668
Amg006	F	0.1262	0.1456	0.3555	0.1835	NA	NA	0.2029	0.29	0.2284	0.2539	0.3558	0.199	0.2787
Amg007	M	0.539	0.5419	0.1207	0.1878	0.3996	0.2553	0.1763	0.1665	0.1371	0.471	0.3799	0.1591	0.3637
Amg008	M	0.2742	0.8793	0.2306	0.1687	0.2744	0.9064	0.5453	0.1278	0.5243	0.3414	0.1768	0.1521	0.1525
Mean dF/F 1s prior to behavior onset
Mouse	Sex	Approached by male	Approaching male	Approaching female	Novel Obj	Attacking	Attacked	2MT	Freeze	Control Odor	Male Bedding	Female Bedding	Light	Sqeak_playback
Amg001	M	0.1267	0.0744	0.1336	0.1082	NA	0.0558	0.7769	-0.1727	NA	NA	NA	NA	NA
Amg002	M	0.3321	0.0988	0.096	0.1454	0.06	0.1401	0.3678	0.2277	0.0653	-0.1015	0.0964	0.0032	0.0855
Amg003	M	-0.1069	0.1862	0.1086	-0.0279	-0.6189	0.6051	0.2105	-0.2188	-0.0565	0.028	-0.448	0.1062	0.0962
Amg004	F	0.0151	-0.0451	-0.1727	0.042	NA	NA	0.0287	-0.2247	-0.0104	-0.1171	-0.2062	0.141	0.0195
Amg005	F	-0.0268	0.0244	0.1103	-0.0867	NA	NA	0.1422	-0.0098	0.1272	-0.0192	-0.145	-0.0125	0.0613
Amg006	F	-0.0252	-0.1597	-0.0088	0.0849	NA	NA	0.0883	0.234	-0.0543	0.1596	-0.1901	-0.0592	-0.1837
Amg007	M	0.0057	0.2397	0.091	-0.107	-0.0369	0.2778	0.0748	-0.003	-0.0742	0.0678	-0.1584	0.1854	-0.0551
Amg008	M	0.0854	-0.2503	0.2665	-0.0826	0.3032	0.0586	0.0722	-0.1716	-0.192	-0.2319	0.0762	-0.0189	0.0668
STE at mean dF/F 1s prior to behavior onset
Mouse	Sex	Approached by male	Approaching male	Approaching female	Novel Obj	Attacking	Attacked	2MT	Freeze	Control Odor	Male Bedding	Female Bedding	Light	Sqeak_playback
Amg001	M	0.1416	0.0873	0.1821	0.0965	NA	0.1207	0.295	0.16	NA	NA	NA	NA	NA
Amg002	M	0.0962	0.14	0.1044	0.0906	0.1849	0.1318	0.1482	0.2103	0.0838	0.1244	0.1136	0.0797	0.1022
Amg003	M	0.1161	0.1292	0.1168	0.1176	0.0603	0.2761	0.1808	0.2482	0.0961	0.1629	0.1102	0.1048	0.169
Amg004	F	0.1178	0.1109	0.09	0.1162	NA	NA	0.1212	0.1843	0.0721	0.097	0.086	0.1389	0.1513
Amg005	F	0.0876	0.1246	0.1134	0.093	NA	NA	0.1845	0.2254	0.1153	0.0965	0.0805	0.0862	0.1113
Amg006	F	0.0704	0.083	0.1858	0.1196	NA	NA	0.1242	0.1639	0.1242	0.1374	0.1551	0.0848	0.0653
Amg007	M	0.1069	0.2501	0.0844	0.0766	0.1675	0.1301	0.1962	0.1731	0.0888	0.0817	0.1543	0.0969	0.0972
Amg008	M	0.3145	0.1731	0.1177	0.0854	0.163	0.1789	0.1636	0.0972	0.1384	0.1261	0.1079	0.0792	0.1179
Number of Trials
Amg001	M	16	36	18	31	0	19	7	3	0	0	0	0	0	25	27
Amg002	M	22	21	27	39	8	18	26	10	39	14	27	31	20	23	24
Amg003	M	18	13	12	24	2	11	17	2	37	16	12	23	10	37	27
Amg004	F	40	18	19	32	0	0	39	6	71	38	42	17	12	23	25
Amg005	F	20	10	25	42	0	0	15	6	44	25	50	32	19	22	27
Amg006	F	34	22	20	36	0	0	22	15	21	19	21	39	29	13	21
Amg007	M	12	11	30	29	16	20	17	9	48	22	12	31	29	29	30
Amg008	M	8	10	38	40	24	13	18	14	12	22	23	30	26	27	63
