# Supplementary material for: Nested circuits mediate the decision to vocalize
Source: eLife. 2023 Jun 14;12:e85547. doi: 10.7554/eLife.85547 (PMC10353859; doi:10.7554/eLife.85547)
Supplement: Figure 2—source data 1. [file elife-85547-fig2-data1.xlsx]

## Sheet: USV characterization
USV characterization during home-cage interaction with a novel female
USVs per min			Bouts per min			USVs per bout
Isolated Males	Isolated Females	Group-housed females	Isolated Males	Isolated Females	Group-housed females	Isolated Males	Isolated Females	Group-housed females
41.4356	56.8645	83.517	4.1007	3.6234	7.82441	10.6453	16.0177	10.6739
52.3059	56.0785	4.369	4.42374	3.43313	2.08952	12.2677	14.8261	2.09091
51.5908	30.6294	12.8972	4.75135	2.44475	3.26728	11.2332	11.9055	3.94737
61.0965	61.5543	2.64568	4.8083	4.28872	0.377954	11.8944	14.4021	7
77.2681	47.9503	12.8972	3.80223	5.45195	3.26728	17.4024	9.93519	3.94737
62.5668	56.5611	4.91337	5.0513	5.5868	2.64566	12.462	10.703	1.85714
79.8643	111.406	12.8558	5.53045	6.35785	2.64678	14.1012	17.5897	4.85714
71.9943	36.1181	11.9437	5.62009	4.4395	1.51399	12.9302	8.32787	7.88889
83.0252	49.1697	2.18622	6.25544	5.65836	0.546555	13.25	9.05072	4
91.1742	81.5554	0.892012	5.7791	4.62937	0.178402	14.9382	14.989	5
99.955	92.9703	3.66572	4.53584	4.93465	0.549858	19.3	21.8824	6.66667
99.1055	90.5877	3.8155	5.86028	4.86641	0.726761	14.7802	21.4924	5.25
92.3845	88.1541	3.90729	4.94869	5.64948	0.532812	16.5944	14.0803	7.33333
93.2582	76.8133	9.12964	5.0046	5.84386	1.11792	17.4046	12.5267	8.16667
114.118	55.5432		4.87102	4.99626		19.46	9.64
132.352			5.84028			20.5695
110.431			7.16022			16.7943
118.067			5.25797			19.414

## Sheet: AmgPAG females opto
Effect of optogenetic activation of AmgC/M-PAG neurons on vocalization in females
OPTO	USV rate pre-stim	stim	post-stim	STE pre-stim	STE stim	STE post-stim	N
Amg001	4.82353	0.847059	2.18824	0.18271	0.160972	0.245117	85
Amg002	4.4329	1.68398	2.45532	0.122622	0.133683	0.151988	235
Amg003	5.12698	1.04762	2.38095	0.284874	0.21872	0.3073	63
Amg004	4.3	1.8	2.61538	0.212262	0.221234	0.235323	91
Amg005	5.47059	2.41176	3.88235	0.277612	0.321864	0.393269	34
NATURAL DECAY
Amg001	4.25806	3.25806	2.16129	0.285746	0.314413	0.362479	31
Amg002	5.4	3.65714	2.91429	0.287557	0.456407	0.422819	35
Amg003	5.83333	4.22222	3.94444	0.31997	0.469906	0.430843	36
Amg004	3.94872	2.66667	2.33333	0.348408	0.375234	0.367971	39
Amg005	5.83333	4.83333	4.16667	0.489795	0.860174	0.894709	12
LIGHT CONTROL
Amg001	4.97297	2.48649	1.75676	0.356169	0.343585	0.347461	37
Amg002	4.43902	3.5122	2.97561	0.279479	0.324078	0.320989	41
Amg003	4.27778	2.58333	2.55556	0.31525	0.410913	0.397301	36
Amg004	3.91525	2.89831	2	0.239677	0.250884	0.240543	59
Amg005	6.02273	4.93182	4.68182	0.278718	0.396066	0.407089	44
GFP CONTROL
GFP001	4.1875	2.89583	2.85417	0.339033	0.395273	0.36221	48
GFP002	2.68293	1.90244	1.21429	0.274814	0.30823	0.267339	42
GFP003	3.78788	3	2.84848	0.344759	0.44806	0.431087	33
GFP004	3.6129	1.67742	1.6129	0.349123	0.32918	0.299381	31
GFP005	5.75	4.54545	3.90909	0.308658	0.402758	0.39126	44
Effect of optogenetic activation of AmgC/M-PAG neurons on vocalization in females (data normalized to pre-laser baseline for plotting)
OPTO	USV rate pre-stim	stim	post-stim
Amg001	1	0.17561	0.453659
Amg002	1	0.379883	0.553885
Amg003	1	0.204334	0.464396
Amg004	1	0.418605	0.608229
Amg005	1	0.44086	0.709677
NATURAL DECAY
Amg001	1	0.765152	0.507576
Amg002	1	0.677249	0.539683
Amg003	1	0.72381	0.67619
Amg004	1	0.675325	0.590909
Amg005	1	0.828571	0.714286
LIGHT CONTROL
Amg001	1	0.5	0.353261
Amg002	1	0.791209	0.67033
Amg003	1	0.603896	0.597403
Amg004	1	0.74026	0.510823
Amg005	1	0.818868	0.777358
GFP CONTROL
GFP001	1	0.691542	0.681592
GFP002	1	0.709091	0.452597
GFP003	1	0.792	0.752
GFP004	1	0.464286	0.446429
GFP005	1	0.790514	0.679842

## Sheet: AmgPAG HCR
VM387	Vgat	Vglut
Section 001	9	0
Section 002	6	0
Section 003	26	0
Section 004	39	0
Section 005	19	0
	99
VM386
Section 001	25	0
Section 002	9	0
Section 003	4	0
Section 004	4	0
Section 005	18	0
Section 006	1	0
Section 007	7	0
	68

## Sheet: AmgPAGmales opto(Michael et al)
viral strategy		USV rate (normalized to pre-laser)					type of control		mean usv counts
	mouse ID	pre	laser	post				mouse ID	pre	laser	post
retro-Cre	VM118	1	0.390805	0.781609			dummy cable	VM118	1	0.641026	0.555556
retro-Cre	VM159	1	0.0528634	0.171806			dummy cable	VM159	1	0.70303	0.557576
retro-Cre	VM218	1	0.348101	0.60443			dummy cable	VM218	1	0.614943	0.683908
retro-Cre	VM169	1	0.0978723	0.523404			dummy cable	VM169	1	0.603448	0.568966
retro-Cre	VM170	1	0.317797	0.639831			dummy cable	VM185	1	0.532872	0.567474
retro-Cre	VM185	1	0.261224	0.497959			dummy cable	VM200	1	0.488462	0.342308
retro-Cre	VM200	1	0.163194	0.6875			dummy cable	VM181	1	0.691176	0.654412
retro-Cre	Amg;Ai14	1	0.304965	0.884161			dummy cable	VM193	1	0.657303	0.561798
							dummy cable	VM202	1	0.589744	0.598291
retro-ChR2	VM46	1	0.0430108	0.55914				mean	1	0.613556	0.565587
retro-ChR2	VM69	1	0.158385	0.847826				stdev	0	0.0702928	0.0955295
retro-ChR2	VM72	1	0.0952381	0.428571
retro-ChR2	VM73	1	0.127389	0.388535			no laser	VM218	1	0.790541	0.567568
							no laser	VM170	1	0.754601	0.607362
							no laser	VM200	1	0.703125	0.630208
VGAT terminals	VM181	1	0.211934	0.255144			no laser	VM176	1	0.758242	0.549451
VGAT terminals	VM193	1	0.303371	0.429775			no laser	VM181	1	0.935484	0.741935
VGAT terminals	VM202	1	0.16129	0.306452			no laser	VM193	1	0.957627	0.957627
							no laser	VM202	1	0.518519	0.259259
								mean	1	0.77402	0.616201
								stdev	0	0.147754	0.210904
							GFP controls	VM205	1	0.747826	0.604348
							GFP controls	VM208	1	0.541045	0.328358
							GFP controls	VM209	1	0.692308	0.549451
							GFP controls	VM220	1	0.605911	0.571429
								mean	1	0.646772	0.513396
								stdev	0	0.0915301	0.125405
