# Supplementary material for: Nested circuits mediate the decision to vocalize
Source: eLife. 2023 Jun 14;12:e85547. doi: 10.7554/eLife.85547 (PMC10353859; doi:10.7554/eLife.85547)
Supplement: Figure 3—source data 1. [file elife-85547-fig3-data1.xlsx]

## Sheet: Esr1 opto
Effect of optogenetic activation of Esr1+ AmgC/M neurons on vocalization
OPTO	Sex	USV rate pre-stim	stim	post-stim	STE pre-stim	STE stim	STE post-stim	N
ESR001	M	5.25287	1.41379	3.07471	0.150396	0.117586	0.192548	174
ESR002	M	6.03774	2.4717	2.81132	0.194187	0.325059	0.347139	53
ESR003	M	3.59813	1.28972	2.02804	0.19191	0.158245	0.189412	107
ESR004	M	4.49333	1.8	2.73333	0.248508	0.193591	0.278563	75
ESR005	M	3.38462	0.415385	0.907692	0.211101	0.0874101	0.200628	65
ESR006	F	5.08	2.38	2.7451	0.259034	0.308464	0.355178	51
ESR007	F	2.90909	0.181818	0.176471	0.258544	0.0671717	0.0786539	34
ESR008	F	3.24074	0.611111	1.35185	0.211373	0.155083	0.199856	54
ESR009	F	4.61538	2.23077	2.24615	0.256354	0.296428	0.310885	65
NATURAL DECAY
ESR001	M	4.45679	3.09877	2.50617	0.201881	0.234129	0.255268	81
ESR002	M	5.75556	4.8	3.73333	0.250566	0.349025	0.397467	45
ESR003	M	3.96154	2.92308	2.53846	0.472248	0.432961	0.477915	26
ESR004	M	5.29268	3.4878	2.90244	0.312823	0.405935	0.380636	41
ESR005	M	3.81081	2.59459	2.43243	0.335215	0.30624	0.303979	37
ESR006	F	5.22034	3.9661	3.37288	0.234474	0.299001	0.34095	59
ESR007	F	3.72727	2.90909	1.24242	0.31764	0.429419	0.28214	33
ESR008	F	3.5641	3.12821	2.5641	0.256613	0.364	0.326092	39
ESR009	F	6.37838	5.54054	4.64865	0.325012	0.420201	0.460474	37
LIGHT CONTROL
ESR001	M	4.3625	3.0125	2.84146	0.232603	0.254926	0.243228	82
ESR002	M	6.19231	4.05769	3.57692	0.228178	0.317196	0.359472	52
ESR003	M	4.24	3.24	2.98	0.254847	0.294937	0.325125	50
ESR004	M	4.64198	3.2716	2.97531	0.195085	0.268174	0.281626	81
ESR005	M	3.51282	2.10256	2.12821	0.192901	0.194488	0.203498	78
ESR006	F	5.55	4.025	4.3	0.284086	0.407443	0.399037	40
ESR007	F	3.02778	2.05556	1.63889	0.348434	0.421532	0.388634	36
ESR008	F	4.73684	2.42105	2	0.338779	0.407315	0.363717	38
ESR009	F	6.42105	4.42105	3.65789	0.305548	0.478011	0.457708	38
Effect of optogenetic activation of Esr1+ AmgC/M neurons on vocalization (data normalized to pre-laser baseline for plotting)
OPTO	Sex	USV rate pre-stim	stim	post-stim
ESR001	M	1	0.269147	0.585339
ESR002	M	1	0.409375	0.465625
ESR003	M	1	0.358442	0.563636
ESR004	M	1	0.400593	0.608309
ESR005	M	1	0.122727	0.268182
ESR006	F	1	0.468504	0.540374
ESR007	F	1	0.0625	0.0606618
ESR008	F	1	0.188571	0.417143
ESR009	F	1	0.483333	0.486667
NATURAL DECAY
ESR001	M	1	0.695291	0.562327
ESR002	M	1	0.833977	0.648649
ESR003	M	1	0.737864	0.640777
ESR004	M	1	0.658986	0.548387
ESR005	M	1	0.680851	0.638298
ESR006	F	1	0.75974	0.646104
ESR007	F	1	0.780488	0.333333
ESR008	F	1	0.877698	0.719424
ESR009	F	1	0.868644	0.728814
LIGHT CONTROL
ESR001	M	1	0.690544	0.651338
ESR002	M	1	0.65528	0.57764
ESR003	M	1	0.764151	0.70283
ESR004	M	1	0.704787	0.640957
ESR005	M	1	0.59854	0.605839
ESR006	F	1	0.725225	0.774775
ESR007	F	1	0.678899	0.541284
ESR008	F	1	0.511111	0.422222
ESR009	F	1	0.688525	0.569672

## Sheet: Esr1 quantification
AX42 (female)	Esr1+/GFP+	Esr1-/GFP+				Summary
Section 1	12	29					Esr1+/GFP+	Esr1-/GFP+	Overlap
Section 2	22	13				AX42 (female)	115	111	0.50885
Section 3	16	3				AX50 (female)	77	72	0.516779
Section 4	28	26				VM396 (female)	27	69	0.28125
Section 5	11	8				VM400 (female)	61	37	0.622449
Section 6	5	7				VM364 (male)	45	50	0.473684
Section 7	6	11				AX90 (male)	101	89	0.531579
Section 8	6	8				VM405 (male)	24	35	0.40678
Section 9	3	1
Section 10	6	5				Total	450	463	0.492881
Total	115	111
AX50 (female)
Section 1	15	14
Section 2	14	17
Section 3	8	5
Section 4	6	3
Section 5	9	7
Section 6	7	8
Section 7	18	18
Total	77	72
VM364 (male)
Section 1	16	10
Section 2	9	15
Section 3	6	6
Section 4	10	13
Section 5	4	6
Total	45	50
VM396 (female)
Section 1	4	17
Section 2	7	13
Section 3	10	33
Section 4	6	6
Total	27	69
VM400 (female)
Section 1	12	9
Section 2	15	9
Section 3	9	6
Section 4	5	5
Section 5	6	0
Section 6	5	5
Section 7	8	2
Section 8	1	1
Total	61	37
AX90 (male)
Section 1	9	11
Section 2	8	20
Section 3	12	9
Section 5	6	2
Section 6	1	1
Section 7	12	4
Section 8	12	8
Section 9	7	6
Section 10	10	8
Section 11	15	14
Section 12	6	4
Section 13	3	2
Total	101	89
VM405 (male)
Section 1	2	2
Section 2	2	7
Section 3	2	5
Section 4	8	12
Section 5	6	6
Section 6	4	3
Total	24	35
