# Supplementary material for: Nested circuits mediate the decision to vocalize
Source: eLife. 2023 Jun 14;12:e85547. doi: 10.7554/eLife.85547 (PMC10353859; doi:10.7554/eLife.85547)
Supplement: Figure 5—source data 1. [file elife-85547-fig5-data1.xlsx]

## Sheet: POA terminal photometry
Mean peak DF/F at behavior onset
Mouse	Sex	USV Onset	USV Offset	USV alone	USV offset alone	Approaching male	Approaching female	Novel Obj	Attacked	Attacking	2MT	Freeze	Approached by male
POA001	M	1.92088	0.652164	NA	NA	1.0256	1.16893	1.0014	0.517157	0.933778	0.429349	0.581623	0.622821
POA002	M	2.42909	0.951384	1.11908	0.453459	0.817313	1.35095	0.581772	0.395963	NA	0.581772	0.1579	0.00243191
POA003	M	4.01907	0.858539	1.88051	0.656599	1.41595	1.91935	1.35307	0.884217	1.5367	NA	NA	2.44708
POA004	M	1.75713	0.514952	NA	NA	0.549471	1.35552	0.311727	NA	0.507738	0.705242	0.145432	0.44222
POA005	M	5.08376	1.79314	NA	NA	1.51233	3.79641	0.698252	NA	NA	0.139757	0.536031	1.45308
Number of trials
POA001	M	54	61	0	0	23	17	14	15	4	14	2	14
POA002	M	31	46	16	18	21	30	31	23	0	7	23	11
POA003	M	22	21	12	18	29	44	23	8	11	0	0	6
POA004	M	27	34	0	0	13	43	28	0	9	2	12	9
POA005	M	27	27	0	0	28	39	42	0	0	2	9	0
