# Supplementary material for: Nested circuits mediate the decision to vocalize
Source: eLife. 2023 Jun 14;12:e85547. doi: 10.7554/eLife.85547 (PMC10353859; doi:10.7554/eLife.85547)
Supplement: Figure 6—source data 1. [file elife-85547-fig6-data1.xlsx]

## Sheet: POAAmgCM opto
Effect of optogenetic activation of Esr1+ AmgC/M neurons on vocalization
Mouse	Sex	USVs per opto trial	USVs per successful opto trial	USV/second stim	% Success	Mean Latency	Min Latency	N opto trials	Control % Success	Control USVs per trial	N control trials
POA001	M	3.375	4.37838	1.6875	0.770833	2.15963	0.556032	48	0	0	34
POA002	M	7.73333	9.15789	3.86667	0.844444	0.64163	0.152576	45	NA	NA	NA
POA003	M	9.8	10.5	4.9	0.933333	1.96169	0.203264	15	0	0	31
POA004	M	4.3617	5.125	2.18085	0.851064	2.65519	0.749568	47	0.1	0.1	29

## Sheet: POA-Amg GFP and Esr1
VM392	Esr1+/GFP+	Esr1-/GFP+		Overlap
Section 1	14	1
Section 2	19	5
Section 3	45	16
Section 4	28	5
Section 5	24	3
Section 6	9	4
Total	139	34	173	0.803468
VM412
Section 1	11	1
Section 2	11	3
Section 3	26	4
Section 4	28	5
Section 5	42	7
Section 6	41	10
Total	159	30	189	0.84127
Total	298	64	362	0.823204	0.0189008

## Sheet: POAtoAmgSlice
Animal	Cell	TTX/4AP	SR	Connected	Not connected
374	1	757.79	3.4734	2	0
	2	14.839	NA
356	1	38.231	NA	3	2
	2	12.145	NA
	3	12.15	NA
336	1	155.79	4.9777	2	0
	2	153.04	2.246
332	1	77.156	5.1982	1	1
312	1	54.844	NA	1	1
